# Supplementary material for: Extended hepatic metastasectomy for renal cell carcinoma—new aspects in times of targeted therapy: a single-center experience over three decades
Source: Springer Nature journal article supplement (doi:10.1007/s00423-019-01852-4), 2020-01-14
Supplement: MOESM1 [file 17734184]

**Extended hepatic metastasectomy for renal cell carcinoma – new aspects in times of targeted therapy: a single center experience over three decades**

Langenbeck's Archives of Surgery

**Oliver Beetz, Rabea Söffker, Sebastian Cammann, Felix Oldhafer, Florian W. R. Vondran, Florian Imkamp, Jürgen Klempnauer, Moritz Kleine**

**Correspondence and reprint requests to:**

PD Dr. med. Moritz Kleine, Department of General, Visceral and Transplant Surgery, Hannover Medical School, Carl-Neuberg-Strasse 1, 30625 Hannover, Germany

(e-mail: [Kleine.Moritz@mh-hannover.de](mailto:Kleine.Moritz@mh-hannover.de); phone: +49-511-532-6534; fax: +49-511-532-4010)

ORCID: 0000-0002-4515-3209

**Supplemental Table 1** Epidemiological, clinical and histopathological statistics of the 40 patients undergoing nephrectomy for renal cell carcinoma in curative intent

| Variables                     |           | Mean, Median<br>(min.-max.) or n (%) |
|-------------------------------|-----------|--------------------------------------|
| Age at nephrectomy (in years) |           | 55.8, 54 (35-80)                     |
| Male gender                   |           | 25 (62.5)                            |
| Localization RCC              | right     | 16 (48.5)                            |
|                               | left      | 16 (48.5)                            |
|                               | bilateral | 1 (3.0)                              |
| T stadium                     | 1         | 3 (12.5)                             |
|                               | 2         | 6 (25.0)                             |
|                               | 3         | 13 (54.2)                            |
|                               | 4         | 2 (8.3)                              |
| N stadium                     | 0         | 5 (26.3)                             |
|                               | 1         | 10 (52.6)                            |
|                               | 2         | 4 (21.1)                             |
| M stadium                     | 0         | 9 (42.9)                             |
|                               | 1         | 8 (38.1)                             |
|                               | 2         | 4 (19.0)                             |
| Clear cell renal carcinoma    |           | 16 (94.1)                            |
| Chemotherapy                  |           | 13 (59.1)                            |
| Radiotherapy                  |           | 5 (29.4)                             |
